# Supplementary material for: Third Chromosome Balancer Inversions Disrupt Protein-Coding Genes and Influence Distal Recombination Events in Drosophila melanogaster
Source: PubMed Central journal article supplement (PMC4938649; doi:10.1534/g3.116.029330), 2016-06-28
Supplement: 1959TableS1.pdf [file 1959TableS1.pdf]

**Table S1. PCR primers used to validate selected inversion breakpoints**

| <b>Breakpoint</b> | <b>Balancer</b>            | <b>F Primer Seq</b>   | <b>R Primer Seq</b>   | <b>Annealing Temp</b> |
|-------------------|----------------------------|-----------------------|-----------------------|-----------------------|
| 65D-85F           | <i>TM3</i>                 | CGATGGACAGAAGCAACAGA  | ATCACCAGGACTACGGCAAC  | 60                    |
| 65D-85F           | <i>TM3</i>                 | TAATTCCTGTGAGCGACGTG  | TAATGGGCATCAAGCATAACG | 60                    |
| 71B-94D           | <i>TM3</i>                 | TGGACGAACAAGCTAAACGA  | TCTAAAATGCCCATCCAACC  | 60                    |
| 71B-94D           | <i>TM3</i>                 | AACAGCTCTTGAGGCGAGAC  | TACACGAGTTTTGGCAGACG  | 60                    |
| 76B-92F           | <i>TM3</i>                 | GTAAGGGTCCCTGGATGGT   | GGCGATCAAACAACCAAAGT  | 60                    |
| 76B-92F           | <i>TM3</i>                 | TCAGGTGATGTGCTGGAATC  | AGGAAGATCCCGAATAGGT   | 60                    |
| 79F-100D          | <i>TM3</i>                 | CCTCCGAAACGCATTGTATT  | TGCAGTTGGATAGGTTTCGTG | 60                    |
| 79F-100D          | <i>TM3</i>                 | ATTTGGATCCATTCCGTTGA  | AACAGGGCGGCTACTTGTTA  | 60                    |
| 61B-87B           | <i>TM6B</i>                | TCACTTTAGCAGGTCCATCG  | TTGAACCCGAAATGGCTTTA  | 60                    |
| 61B-87B           | <i>TM6B</i>                | TTGACAGGGTGGTCCAATTA  | AATTTGCTTCGCAATGAAGG  | 60                    |
| 75D-94A           | <i>TM6,</i><br><i>TM6B</i> | AAATTGCCGATCAAAAAGGTG | ATTAATTGGCCCAGGACCTC  | 60                    |
| 75D-94A           | <i>TM6,</i><br><i>TM6B</i> | AACCCACGAGTCCCCTAACT  | ACCCCGAAGTGTGCAGTATC  | 60                    |
| 61A-89C           | <i>TM6</i>                 | GCACACTCCGCACACTTG    | CGGGTAAGAGCATGACCAAT  | 63                    |
| 61A-89C           | <i>TM6</i>                 | TTTGAGCTGCACTCTTGAC   | TTCCCCATCAACTCCTCTCA  | 61                    |
| 61A-89C           | <i>TM6</i>                 | ACCCATTTTTCACTTGCTG   | ACGTGTGGGGTCACTAGAGG  | 61                    |
