# Supplementary material for: Third Chromosome Balancer Inversions Disrupt Protein-Coding Genes and Influence Distal Recombination Events in Drosophila melanogaster
Source: PubMed Central journal article supplement (PMC4938649; doi:10.1534/g3.116.029330), 2016-06-28
Supplement: 1959TableS2.pdf [file 1959TableS2.pdf]

**Table S2. Stocks sequenced in this study**

| Bloomington ID     | Current Genotype                                                                                                                                                                    |
|--------------------|-------------------------------------------------------------------------------------------------------------------------------------------------------------------------------------|
| <b>TM3 Stocks</b>  |                                                                                                                                                                                     |
| N/A                | <i>wg<sup>Sp-1</sup>/SM6a, Pr<sup>1</sup> Dr<sup>1</sup>/TM3, Sb<sup>1</sup> Ser<sup>1</sup></i>                                                                                    |
| 120                | <i>TM3, ry<sup>RK</sup> Sb<sup>1</sup> Ser<sup>1</sup>/TM6B, Tb<sup>1</sup></i>                                                                                                     |
| 500                | <i>eg<sup>1</sup>/TM3, Sb<sup>1</sup> Ser<sup>1</sup></i>                                                                                                                           |
| 504                | <i>amd<sup>21</sup> Bl<sup>1</sup>/CyO; DCTN1-p150<sup>1</sup>/TM3, Sb<sup>1</sup> Ser<sup>1</sup></i>                                                                              |
| 560                | <i>Pri<sup>1</sup> Dr<sup>1</sup>/TM3</i>                                                                                                                                           |
| 1614               | <i>y<sup>1</sup> w<sup>*</sup>; TM3 y<sup>+</sup> Ser<sup>1</sup>/Sb<sup>1</sup></i>                                                                                                |
| 1679               | <i>Dp(1;Y)B<sup>S</sup>; dsx<sup>1</sup> p<sup>p</sup>/TM3, Sb<sup>1</sup></i>                                                                                                      |
| 2053               | <i>twr<sup>1</sup> red<sup>1</sup> e<sup>1</sup>/TM3, Sb<sup>1</sup> Ser<sup>1</sup></i>                                                                                            |
| 2098               | <i>sas<sup>15</sup> p<sup>p</sup> cu<sup>1</sup>/TM3, Sb<sup>1</sup> Ser<sup>1</sup></i>                                                                                            |
| 2198               | <i>Df(3R)ro80b, st<sup>1</sup> e<sup>1</sup>/TM3, Sb<sup>1</sup></i>                                                                                                                |
| 2485               | <i>ru<sup>1</sup> h<sup>1</sup> Diap1<sup>1</sup> st<sup>1</sup> cu<sup>1</sup> srp<sup>3</sup> sr<sup>1</sup> e<sup>s</sup> ca<sup>1</sup>/TM3, Sb<sup>1</sup> Ser<sup>1</sup></i> |
| 3251               | <i>CyO, l(2)DTS513<sup>1</sup>/l(2)*<sup>*</sup>; BicF<sup>1</sup>/TM3, Sb<sup>1</sup> Ser<sup>1</sup></i>                                                                          |
| 5457               | <i>hkb<sup>2</sup> p<sup>p</sup>/TM3, p<sup>+</sup> Sb<sup>1</sup></i>                                                                                                              |
| 8852               | <i>mwh<sup>2</sup> ru<sup>1</sup> kni<sup>ri-1</sup>/TM3, mwh<sup>2</sup> ru<sup>1</sup> Sb<sup>1</sup></i>                                                                         |
| 9013               | <i>l(3)SG43<sup>1</sup> red<sup>1</sup>/TM3, Sb<sup>1</sup> Ser<sup>1</sup></i>                                                                                                     |
| 22239              | <i>y<sup>1</sup> w<sup>*</sup>; P{y<sup>+t7.7</sup>=Mae-UAS.6.11}Dpit47<sup>LA00491</sup>/CyO; l(3)*<sup>*</sup>/TM3, Sb<sup>1</sup> Ser<sup>1</sup></i>                            |
| 24759              | <i>w<sup>*</sup>; sna<sup>ScO</sup>/CyO; P{w<sup>+mC</sup>=ninaD-GAL4.W}3/TM3, Sb<sup>1</sup></i>                                                                                   |
| 38418              | <i>w<sup>*</sup>; P{w<sup>+mW.hs</sup>=GawB}nubbin-AC-62/CyO; P{w<sup>+mC</sup>=UAS-NsImb-vhhGFP4}3/TM3, Sb<sup>1</sup> Ser<sup>1</sup></i>                                         |
| <b>TM6 Stocks</b>  |                                                                                                                                                                                     |
| N/A                | <i>+/TM6, Ubx</i>                                                                                                                                                                   |
| <b>TM6B Stocks</b> |                                                                                                                                                                                     |
| 120                | <i>TM3, ry<sup>RK</sup> Sb<sup>1</sup> Ser<sup>1</sup>/TM6B, Tb<sup>1</sup></i>                                                                                                     |
| 587                | <i>Sb<sup>Sp1</sup>/TM6B, Tb<sup>1</sup></i>                                                                                                                                        |
| 2188               | <i>w<sup>1118</sup>; Scr<sup>4</sup> red<sup>1</sup> e<sup>1</sup>/TM6B, Tb<sup>1</sup></i>                                                                                         |
